# Supplementary material for: Air–water interface of submerged superhydrophobic surfaces imaged by atomic force microscopy
Source: PubMed Central journal article supplement (PMC5564253; doi:10.3762/bjnano.8.167), 2017-08-11
Supplement: Beilstein_J_Nanotechnol-08-1671-s001.pdf [file Beilstein_J_Nanotechnol-08-1671-s001.pdf]

# Supporting Information

for

## **Air–water interface of submerged superhydrophobic surfaces imaged by atomic force microscopy**

Markus Moosmann<sup>\*1,2</sup>, Thomas Schimmel<sup>2</sup>, Wilhelm Barthlott<sup>1</sup>, and Matthias Mail<sup>1,3</sup>

Address: <sup>1</sup>Nees Institute for Biodiversity of Plants, University of Bonn,

Venusbergweg 22, D-53115 Bonn, Germany, <sup>2</sup>Institute of Applied Physics and

Institute of Nanotechnology, Karlsruhe Institute of Technology (KIT), Hermann-von-

Helmholtz-Platz 1, D-76344 Eggenstein-Leopoldshafen, Germany and <sup>3</sup>Institute of

Crop Science and Resource Conservation (INRES) – Horticultural Science,

University of Bonn, Auf dem Hügel 6, D-53121 Bonn, Germany

Email: Markus Moosmann - [moosmann@uni-bonn.de](mailto:moosmann@uni-bonn.de)

\* Corresponding author

## Additional AFM Images

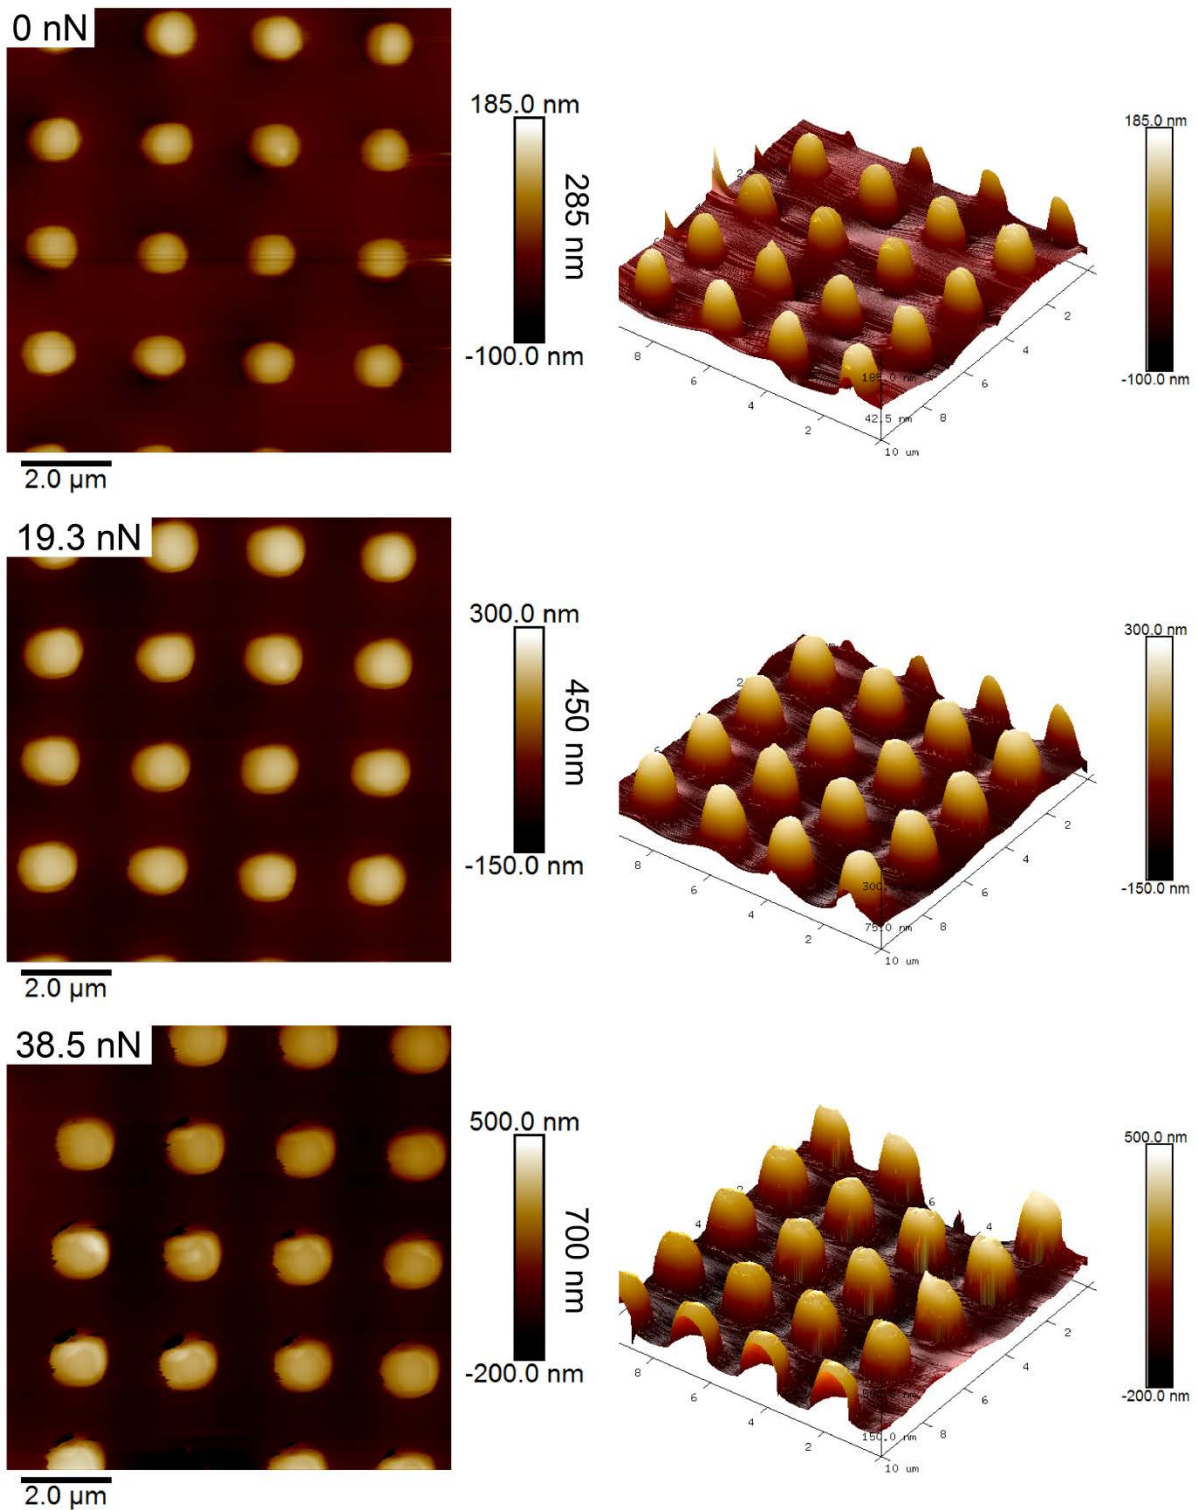

Figure S1: left: AFM height images of submerged pillar sample the taken with different setpoints and corresponding 3D representation (right). Top: 0 nN, middle: 19.3 nN, bottom: 38.8 nN. Note the different height scales.
